# Supplementary material for: Preparation of terpyridine-functionalized paramagnetic nickel–zinc ferrite microspheres for adsorbing Pb(ii), Hg(ii), and Cd(ii) from water
Source: Royal Society of Chemistry journal article supplement (doi:10.1039/d0ra06746f), 2020-01-01

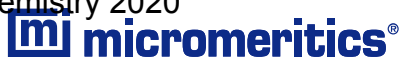

**Micromeritics Instrument Corporation**

TriStar II 3020 3.02

TriStar II 3020 Version 3.02  
Serial # 1647 Unit 1 Port 3

Page 1

Sample: 003  
Operator:  
Submitter:  
File: D:\TriStar II 3020\data\FYH\WAILAI\3.SMP

|                                          |                                                   |
|------------------------------------------|---------------------------------------------------|
| Started: 9/26/2020 12:30:31 PM           | Analysis Adsorptive: N2                           |
| Completed: 1/1/1970 8:00:00 AM           | Analysis Bath Temp.: -195.850 °C                  |
| Report Time: 9/27/2020 11:50:51 AM       | Thermal Correction: No                            |
| Sample Mass: 0.1389 g                    | Warm Free Space: 14.9818 cm <sup>3</sup> Measured |
| Cold Free Space: 48.0193 cm <sup>3</sup> | Equilibration Interval: 10 s                      |
| Low Pressure Dose: None                  | Sample Density: 1.000 g/cm <sup>3</sup>           |
| Automatic Degas: No                      |                                                   |

**Summary Report**

**Surface Area**

Single point surface area at P/Po = 0.294475879: 10.7435 m<sup>2</sup>/g

BET Surface Area: 11.0177 m<sup>2</sup>/g

**Pore Volume**

Single point adsorption total pore volume of pores  
less than 259.8129 nm diameter at P/Po = 0.992513732: 0.028108 cm<sup>3</sup>/g

BJH Adsorption cumulative volume of pores  
between 1.7000 nm and 300.0000 nm diameter: 0.027739 cm<sup>3</sup>/g

BJH Desorption cumulative volume of pores  
between 1.7000 nm and 300.0000 nm diameter: 0.027529 cm<sup>3</sup>/g

**Pore Size**

Adsorption average pore diameter (4V/A by BET): 10.20465 nm

BJH Adsorption average pore diameter (4V/A): 10.3002 nm

BJH Desorption average pore diameter (4V/A): 7.8967 nm

Sample: 003  
Operator:  
Submitter:  
File: D:\TriStar II 3020\data\FYH\WAILAI\3.SMP

|                                          |                                                   |
|------------------------------------------|---------------------------------------------------|
| Started: 9/26/2020 12:30:31 PM           | Analysis Adsorptive: N2                           |
| Completed: 1/1/1970 8:00:00 AM           | Analysis Bath Temp.: -195.850 °C                  |
| Report Time: 9/27/2020 11:50:51 AM       | Thermal Correction: No                            |
| Sample Mass: 0.1389 g                    | Warm Free Space: 14.9818 cm <sup>3</sup> Measured |
| Cold Free Space: 48.0193 cm <sup>3</sup> | Equilibration Interval: 10 s                      |
| Low Pressure Dose: None                  | Sample Density: 1.000 g/cm <sup>3</sup>           |
| Automatic Degas: No                      |                                                   |

**Isotherm Tabular Report**

| Relative Pressure (P/Po) | Absolute Pressure (mmHg) | Quantity Adsorbed (cm <sup>3</sup> /g STP) | Elapsed Time (h:min) | Saturation Pressure (mmHg) |
|--------------------------|--------------------------|--------------------------------------------|----------------------|----------------------------|
|                          |                          |                                            | 00:54                | 763.173340                 |
| 0.051347823              | 39.191380                | 2.3343                                     | 01:02                | 763.252991                 |
| 0.084480001              | 64.481552                | 2.5785                                     | 01:04                | 763.275940                 |
| 0.119687601              | 91.360825                | 2.7793                                     | 01:06                | 763.327393                 |
| 0.154649241              | 118.059235               | 2.9428                                     | 01:09                | 763.400024                 |
| 0.189603966              | 144.736359               | 3.0969                                     | 01:11                | 763.361450                 |
| 0.224554123              | 171.417496               | 3.2376                                     | 01:13                | 763.368286                 |
| 0.259512937              | 198.127594               | 3.3630                                     | 01:15                | 763.459412                 |
| 0.294475879              | 224.836090               | 3.4985                                     | 01:17                | 763.512756                 |
| 0.329353223              | 251.466171               | 3.6357                                     | 01:19                | 763.515137                 |
| 0.364200878              | 278.039429               | 3.7787                                     | 01:21                | 763.423279                 |
| 0.399024433              | 304.653961               | 3.9344                                     | 01:23                | 763.497009                 |
| 0.433915779              | 331.350128               | 4.0993                                     | 01:25                | 763.627747                 |
| 0.468876172              | 358.044708               | 4.2866                                     | 01:27                | 763.623169                 |
| 0.503696530              | 384.688080               | 4.4978                                     | 01:29                | 763.729858                 |
| 0.538716563              | 411.439941               | 4.7331                                     | 01:31                | 763.741028                 |
| 0.573527560              | 438.023132               | 5.0483                                     | 01:34                | 763.735107                 |
| 0.608737749              | 464.914093               | 5.3338                                     | 01:36                | 763.734619                 |
| 0.643226962              | 491.317200               | 5.6427                                     | 01:38                | 763.831787                 |
| 0.678286014              | 518.133057               | 5.9843                                     | 01:40                | 763.885803                 |
| 0.713298772              | 544.881287               | 6.3309                                     | 01:42                | 763.889282                 |

Sample: 003  
Operator:  
Submitter:  
File: D:\TriStar II 3020\data\FYH\WAILAI\3.SMP

|                                          |                                                   |
|------------------------------------------|---------------------------------------------------|
| Started: 9/26/2020 12:30:31 PM           | Analysis Adsorptive: N2                           |
| Completed: 1/1/1970 8:00:00 AM           | Analysis Bath Temp.: -195.850 °C                  |
| Report Time: 9/27/2020 11:50:51 AM       | Thermal Correction: No                            |
| Sample Mass: 0.1389 g                    | Warm Free Space: 14.9818 cm <sup>3</sup> Measured |
| Cold Free Space: 48.0193 cm <sup>3</sup> | Equilibration Interval: 10 s                      |
| Low Pressure Dose: None                  | Sample Density: 1.000 g/cm <sup>3</sup>           |
| Automatic Degas: No                      |                                                   |

**Isotherm Tabular Report**

| Relative Pressure (P/Po) | Absolute Pressure (mmHg) | Quantity Adsorbed (cm <sup>3</sup> /g STP) | Elapsed Time (h:min) | Saturation Pressure (mmHg) |
|--------------------------|--------------------------|--------------------------------------------|----------------------|----------------------------|
| 0.748059865              | 571.496643               | 6.7271                                     | 01:44                | 763.971802                 |
| 0.783130643              | 598.350098               | 7.0869                                     | 01:46                | 764.048889                 |
| 0.817782315              | 624.898743               | 7.4479                                     | 01:48                | 764.138245                 |
| 0.852699967              | 651.597778               | 7.8861                                     | 01:50                | 764.158325                 |
| 0.887416842              | 678.180969               | 8.4989                                     | 01:52                | 764.219177                 |
| 0.921981125              | 704.623962               | 9.5105                                     | 01:55                | 764.249878                 |
| 0.956347453              | 730.985962               | 11.2368                                    | 01:58                | 764.351868                 |
| 0.992513732              | 758.754456               | 18.1716                                    | 02:05                | 764.477539                 |
| 0.957938718              | 732.253174               | 12.3325                                    | 02:10                | 764.405029                 |
| 0.914246310              | 698.883606               | 9.8695                                     | 02:13                | 764.436890                 |
| 0.875198936              | 669.080933               | 8.8137                                     | 02:16                | 764.490112                 |
| 0.838673906              | 641.223328               | 8.2212                                     | 02:18                | 764.568115                 |
| 0.803374717              | 614.182129               | 7.7827                                     | 02:20                | 764.502686                 |
| 0.785980164              | 600.922852               | 7.6409                                     | 02:22                | 764.552185                 |
| 0.752111997              | 574.974243               | 7.3583                                     | 02:24                | 764.479553                 |
| 0.716516262              | 547.795837               | 7.1206                                     | 02:26                | 764.526733                 |
| 0.681659273              | 521.149109               | 6.9123                                     | 02:28                | 764.530212                 |
| 0.646439006              | 494.207947               | 6.7419                                     | 02:31                | 764.508240                 |
| 0.611355078              | 467.390472               | 6.6118                                     | 02:33                | 764.515564                 |
| 0.576476267              | 440.700378               | 6.4741                                     | 02:35                | 764.472717                 |
| 0.541121850              | 413.709717               | 6.3492                                     | 02:37                | 764.540771                 |

Sample: 003  
Operator:  
Submitter:  
File: D:\TriStar II 3020\data\FYH\WAILAI\3.SMP

Started: 9/26/2020 12:30:31 PM  
Completed: 1/1/1970 8:00:00 AM  
Report Time: 9/27/2020 11:50:51 AM  
Sample Mass: 0.1389 g  
Cold Free Space: 48.0193 cm<sup>3</sup>  
Low Pressure Dose: None  
Automatic Degas: No

Analysis Adsorptive: N2  
Analysis Bath Temp.: -195.850 °C  
Thermal Correction: No  
Warm Free Space: 14.9818 cm<sup>3</sup> Measured  
Equilibration Interval: 10 s  
Sample Density: 1.000 g/cm<sup>3</sup>

**Isotherm Tabular Report**

| Relative Pressure (P/Po) | Absolute Pressure (mmHg) | Quantity Adsorbed (cm <sup>3</sup> /g STP) | Elapsed Time (h:min) | Saturation Pressure (mmHg) |
|--------------------------|--------------------------|--------------------------------------------|----------------------|----------------------------|
| 0.506106394              | 386.973694               | 6.2269                                     | 02:39                | 764.609375                 |
| 0.472742088              | 361.401978               | 5.5178                                     | 02:42                | 764.480225                 |
| 0.437233438              | 334.287781               | 4.1375                                     | 02:45                | 764.552185                 |
| 0.401388761              | 306.887726               | 3.7475                                     | 02:47                | 764.564819                 |
| 0.347434792              | 265.652069               | 3.4000                                     | 02:49                | 764.609863                 |
| 0.311637391              | 238.289963               | 3.1807                                     | 02:52                | 764.638550                 |
| 0.276548303              | 211.447678               | 2.9674                                     | 02:54                | 764.595825                 |
| 0.241445605              | 184.636581               | 2.7521                                     | 02:56                | 764.712952                 |
| 0.206391774              | 157.840225               | 2.5330                                     | 02:58                | 764.760254                 |
| 0.171337956              | 131.024490               | 2.3045                                     | 03:00                | 764.713745                 |
| 0.136271401              | 104.217247               | 2.0631                                     | 03:02                | 764.777100                 |
| 0.102975160              | 78.747978                | 1.7951                                     | 03:05                | 764.727905                 |

Sample: 003  
Operator:  
Submitter:  
File: D:\TriStar II 3020\data\FYH\WAILAI\3.SMP

|                                          |                                                   |
|------------------------------------------|---------------------------------------------------|
| Started: 9/26/2020 12:30:31 PM           | Analysis Adsorptive: N2                           |
| Completed: 1/1/1970 8:00:00 AM           | Analysis Bath Temp.: -195.850 °C                  |
| Report Time: 9/27/2020 11:50:51 AM       | Thermal Correction: No                            |
| Sample Mass: 0.1389 g                    | Warm Free Space: 14.9818 cm <sup>3</sup> Measured |
| Cold Free Space: 48.0193 cm <sup>3</sup> | Equilibration Interval: 10 s                      |
| Low Pressure Dose: None                  | Sample Density: 1.000 g/cm <sup>3</sup>           |
| Automatic Degas: No                      |                                                   |

**Isotherm Linear Plot**

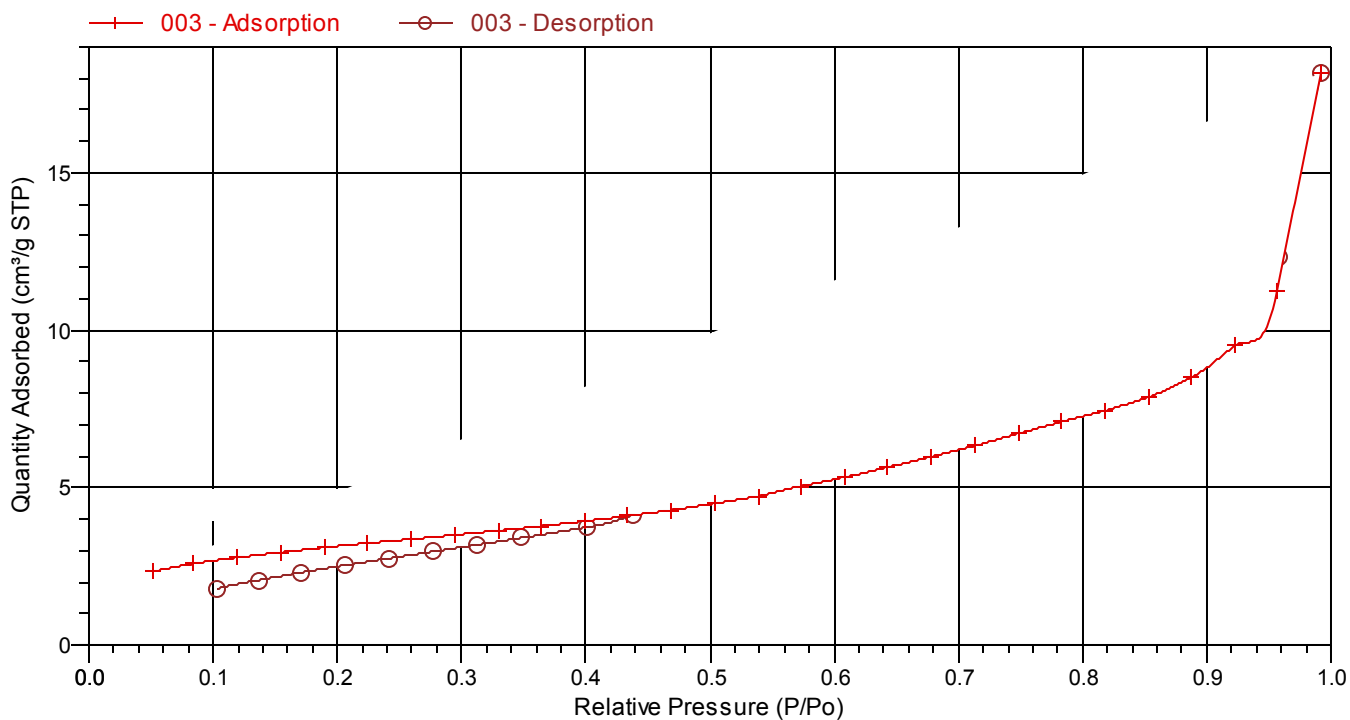

Sample: 003  
Operator:  
Submitter:  
File: D:\TriStar II 3020\data\FYH\WAILAI\3.SMP

|                                          |                                                   |
|------------------------------------------|---------------------------------------------------|
| Started: 9/26/2020 12:30:31 PM           | Analysis Adsorptive: N2                           |
| Completed: 1/1/1970 8:00:00 AM           | Analysis Bath Temp.: -195.850 °C                  |
| Report Time: 9/27/2020 11:50:51 AM       | Thermal Correction: No                            |
| Sample Mass: 0.1389 g                    | Warm Free Space: 14.9818 cm <sup>3</sup> Measured |
| Cold Free Space: 48.0193 cm <sup>3</sup> | Equilibration Interval: 10 s                      |
| Low Pressure Dose: None                  | Sample Density: 1.000 g/cm <sup>3</sup>           |
| Automatic Degas: No                      |                                                   |

**Isotherm Log Plot**

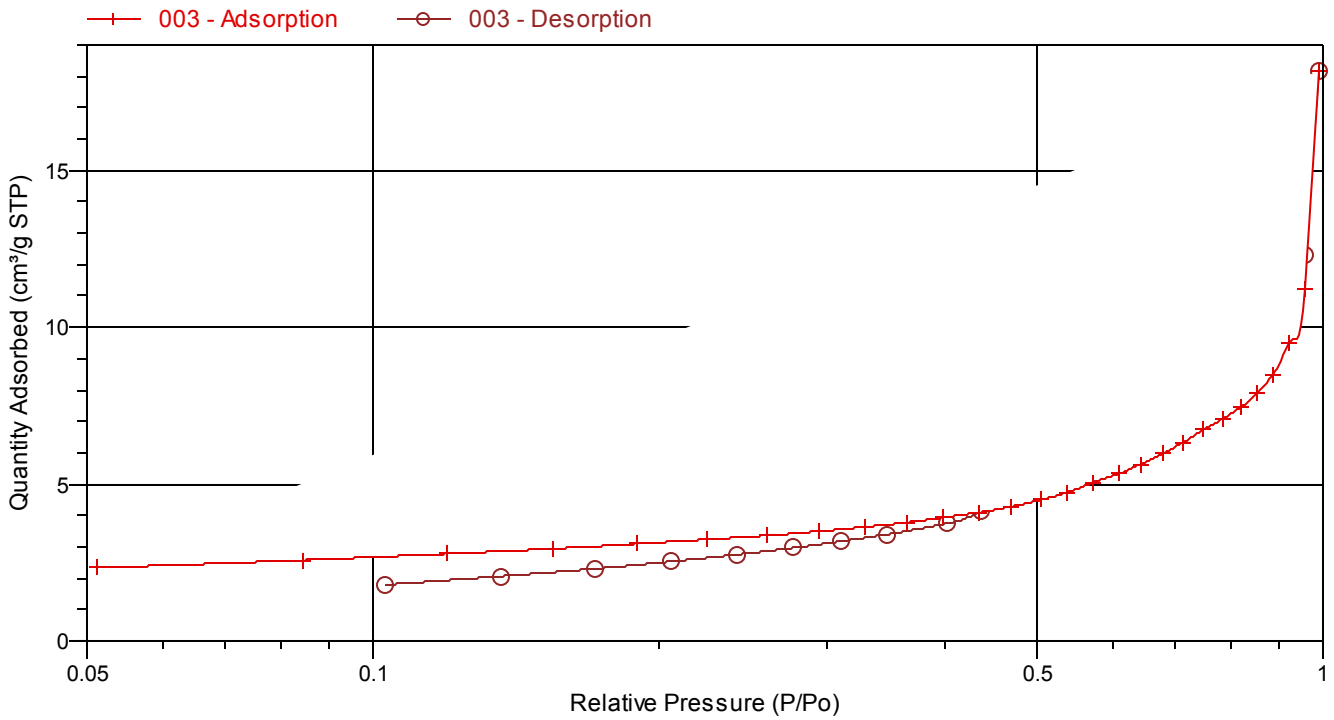

Sample: 003  
Operator:  
Submitter:  
File: D:\TriStar II 3020\data\FYH\WAILAI\3.SMP

|                                          |                                                   |
|------------------------------------------|---------------------------------------------------|
| Started: 9/26/2020 12:30:31 PM           | Analysis Adsorptive: N2                           |
| Completed: 1/1/1970 8:00:00 AM           | Analysis Bath Temp.: -195.850 °C                  |
| Report Time: 9/27/2020 11:50:51 AM       | Thermal Correction: No                            |
| Sample Mass: 0.1389 g                    | Warm Free Space: 14.9818 cm <sup>3</sup> Measured |
| Cold Free Space: 48.0193 cm <sup>3</sup> | Equilibration Interval: 10 s                      |
| Low Pressure Dose: None                  | Sample Density: 1.000 g/cm <sup>3</sup>           |
| Automatic Degas: No                      |                                                   |

**BET Report**

BET Surface Area: 11.0177 ± 0.1232 m<sup>2</sup>/g  
Slope: 0.392932 ± 0.004341 g/cm<sup>3</sup> STP  
Y-Intercept: 0.002122 ± 0.000824 g/cm<sup>3</sup> STP  
C: 186.131477  
Qm: 2.5313 cm<sup>3</sup>/g STP  
Correlation Coefficient: 0.9996341  
Molecular Cross-Sectional Area: 0.1620 nm<sup>2</sup>

| Relative Pressure (P/Po) | Quantity Adsorbed (cm <sup>3</sup> /g STP) | 1/[Q(Po/P - 1)] |
|--------------------------|--------------------------------------------|-----------------|
| 0.051347823              | 2.3343                                     | 0.023188        |
| 0.084480001              | 2.5785                                     | 0.035786        |
| 0.119687601              | 2.7793                                     | 0.048920        |
| 0.154649241              | 2.9428                                     | 0.062165        |
| 0.189603966              | 3.0969                                     | 0.075548        |
| 0.224554123              | 3.2376                                     | 0.089442        |
| 0.259512937              | 3.3630                                     | 0.104211        |
| 0.294475879              | 3.4985                                     | 0.119303        |

Sample: 003  
Operator:  
Submitter:  
File: D:\TriStar II 3020\data\FYH\WAILAI\3.SMP

|                                          |                                                   |
|------------------------------------------|---------------------------------------------------|
| Started: 9/26/2020 12:30:31 PM           | Analysis Adsorptive: N2                           |
| Completed: 1/1/1970 8:00:00 AM           | Analysis Bath Temp.: -195.850 °C                  |
| Report Time: 9/27/2020 11:50:51 AM       | Thermal Correction: No                            |
| Sample Mass: 0.1389 g                    | Warm Free Space: 14.9818 cm <sup>3</sup> Measured |
| Cold Free Space: 48.0193 cm <sup>3</sup> | Equilibration Interval: 10 s                      |
| Low Pressure Dose: None                  | Sample Density: 1.000 g/cm <sup>3</sup>           |
| Automatic Degas: No                      |                                                   |

**BET Surface Area Plot**

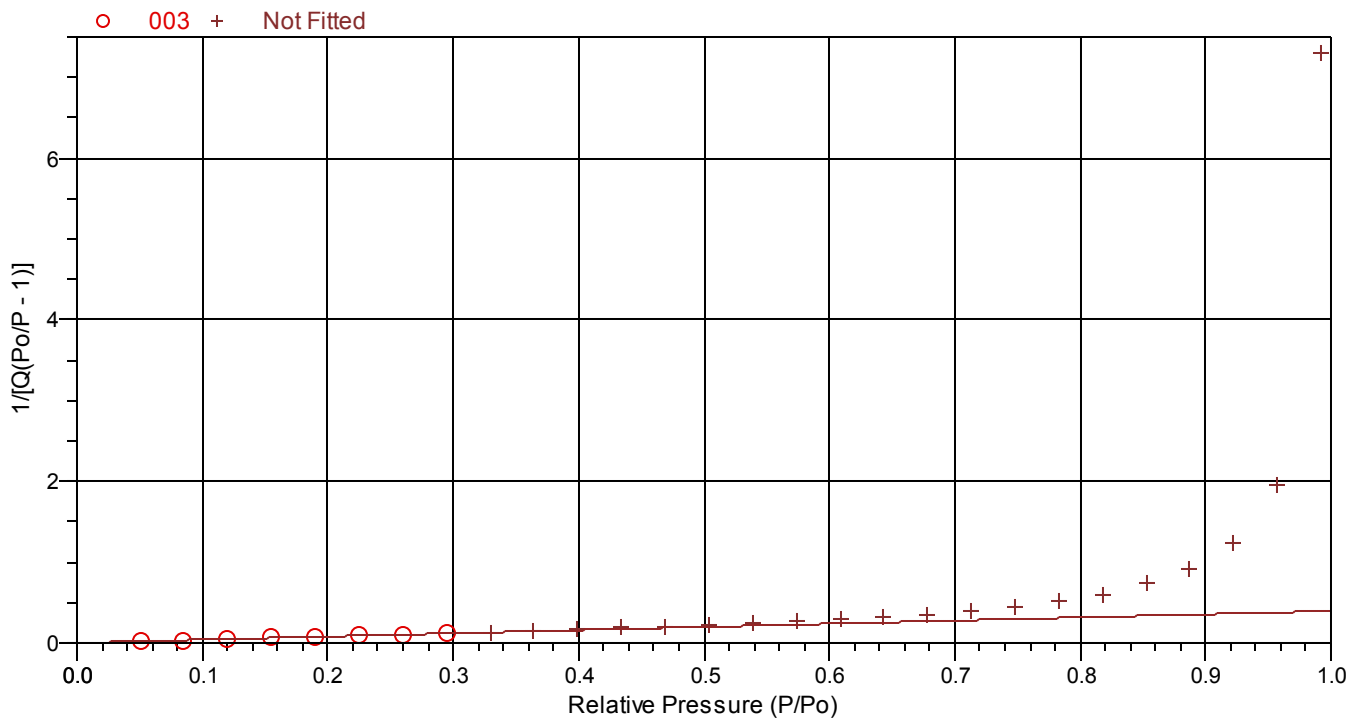



Sample: 003  
Operator:  
Submitter:  
File: D:\TriStar II 3020\data\FYH\WAILAI\3.SMP

|                                          |                                                   |
|------------------------------------------|---------------------------------------------------|
| Started: 9/26/2020 12:30:31 PM           | Analysis Adsorptive: N2                           |
| Completed: 1/1/1970 8:00:00 AM           | Analysis Bath Temp.: -195.850 °C                  |
| Report Time: 9/27/2020 11:50:51 AM       | Thermal Correction: No                            |
| Sample Mass: 0.1389 g                    | Warm Free Space: 14.9818 cm <sup>3</sup> Measured |
| Cold Free Space: 48.0193 cm <sup>3</sup> | Equilibration Interval: 10 s                      |
| Low Pressure Dose: None                  | Sample Density: 1.000 g/cm <sup>3</sup>           |
| Automatic Degas: No                      |                                                   |

**BJH Adsorption Pore Distribution Report**

Faas Correction

Halsey

$$t = 3.54 [-5 / \ln(P/P_0)]^{0.333}$$

Diameter Range: 1.7000 nm to 300.0000 nm

Adsorbate Property Factor: 0.95300 nm

Density Conversion Factor: 0.0015468

Fraction of Pores Open at Both Ends: 0.00

| Pore Diameter Range (nm) | Average Diameter (nm) | Incremental Pore Volume (cm <sup>3</sup> /g) | Cumulative Pore Volume (cm <sup>3</sup> /g) | Incremental Pore Area (m <sup>2</sup> /g) | Cumulative Pore Area (m <sup>2</sup> /g) |
|--------------------------|-----------------------|----------------------------------------------|---------------------------------------------|-------------------------------------------|------------------------------------------|
| 259.7 - 46.0             | 51.9                  | 0.012220                                     | 0.012220                                    | 0.941                                     | 0.941                                    |
| 46.0 - 26.1              | 30.8                  | 0.002872                                     | 0.015092                                    | 0.374                                     | 1.315                                    |
| 26.1 - 18.3              | 20.8                  | 0.001720                                     | 0.016812                                    | 0.331                                     | 1.646                                    |
| 18.3 - 14.1              | 15.6                  | 0.001034                                     | 0.017846                                    | 0.265                                     | 1.911                                    |
| 14.1 - 11.4              | 12.4                  | 0.000742                                     | 0.018588                                    | 0.239                                     | 2.150                                    |
| 11.4 - 9.6               | 10.3                  | 0.000629                                     | 0.019218                                    | 0.244                                     | 2.394                                    |
| 9.6 - 8.3                | 8.8                   | 0.000671                                     | 0.019889                                    | 0.304                                     | 2.698                                    |
| 8.3 - 7.2                | 7.7                   | 0.000802                                     | 0.020691                                    | 0.418                                     | 3.116                                    |
| 7.2 - 6.4                | 6.8                   | 0.000709                                     | 0.021400                                    | 0.418                                     | 3.534                                    |
| 6.4 - 5.8                | 6.1                   | 0.000727                                     | 0.022126                                    | 0.479                                     | 4.013                                    |
| 5.8 - 5.2                | 5.5                   | 0.000666                                     | 0.022793                                    | 0.487                                     | 4.500                                    |
| 5.2 - 4.8                | 5.0                   | 0.000619                                     | 0.023412                                    | 0.498                                     | 4.997                                    |

Sample: 003  
Operator:  
Submitter:  
File: D:\TriStar II 3020\data\FYH\WAILAI\3.SMP

|                                          |                                                   |
|------------------------------------------|---------------------------------------------------|
| Started: 9/26/2020 12:30:31 PM           | Analysis Adsorptive: N2                           |
| Completed: 1/1/1970 8:00:00 AM           | Analysis Bath Temp.: -195.850 °C                  |
| Report Time: 9/27/2020 11:50:51 AM       | Thermal Correction: No                            |
| Sample Mass: 0.1389 g                    | Warm Free Space: 14.9818 cm <sup>3</sup> Measured |
| Cold Free Space: 48.0193 cm <sup>3</sup> | Equilibration Interval: 10 s                      |
| Low Pressure Dose: None                  | Sample Density: 1.000 g/cm <sup>3</sup>           |
| Automatic Degas: No                      |                                                   |

| Pore Diameter Range (nm) | Average Diameter (nm) | Incremental Pore Volume (cm <sup>3</sup> /g) | Cumulative Pore Volume (cm <sup>3</sup> /g) | Incremental Pore Area (m <sup>2</sup> /g) | Cumulative Pore Area (m <sup>2</sup> /g) |
|--------------------------|-----------------------|----------------------------------------------|---------------------------------------------|-------------------------------------------|------------------------------------------|
| 4.8 - 4.4                | 4.5                   | 0.000734                                     | 0.024146                                    | 0.645                                     | 5.643                                    |
| 4.4 - 4.0                | 4.2                   | 0.000504                                     | 0.024650                                    | 0.482                                     | 6.125                                    |
| 4.0 - 3.7                | 3.9                   | 0.000444                                     | 0.025094                                    | 0.461                                     | 6.586                                    |
| 3.7 - 3.4                | 3.6                   | 0.000378                                     | 0.025472                                    | 0.424                                     | 7.011                                    |
| 3.4 - 3.2                | 3.3                   | 0.000312                                     | 0.025784                                    | 0.378                                     | 7.389                                    |
| 3.2 - 3.0                | 3.1                   | 0.000290                                     | 0.026073                                    | 0.378                                     | 7.767                                    |
| 3.0 - 2.8                | 2.8                   | 0.000248                                     | 0.026321                                    | 0.348                                     | 8.115                                    |
| 2.8 - 2.6                | 2.6                   | 0.000230                                     | 0.026551                                    | 0.347                                     | 8.463                                    |
| 2.6 - 2.4                | 2.5                   | 0.000223                                     | 0.026774                                    | 0.362                                     | 8.825                                    |
| 2.4 - 2.2                | 2.3                   | 0.000174                                     | 0.026948                                    | 0.305                                     | 9.130                                    |
| 2.2 - 2.0                | 2.1                   | 0.000234                                     | 0.027182                                    | 0.444                                     | 9.574                                    |
| 2.0 - 1.9                | 1.9                   | 0.000276                                     | 0.027458                                    | 0.568                                     | 10.142                                   |
| 1.9 - 1.7                | 1.8                   | 0.000281                                     | 0.027739                                    | 0.631                                     | 10.772                                   |

Sample: 003  
Operator:  
Submitter:  
File: D:\TriStar II 3020\data\FYH\WAILAI\3.SMP

|                                          |                                                   |
|------------------------------------------|---------------------------------------------------|
| Started: 9/26/2020 12:30:31 PM           | Analysis Adsorptive: N2                           |
| Completed: 1/1/1970 8:00:00 AM           | Analysis Bath Temp.: -195.850 °C                  |
| Report Time: 9/27/2020 11:50:51 AM       | Thermal Correction: No                            |
| Sample Mass: 0.1389 g                    | Warm Free Space: 14.9818 cm <sup>3</sup> Measured |
| Cold Free Space: 48.0193 cm <sup>3</sup> | Equilibration Interval: 10 s                      |
| Low Pressure Dose: None                  | Sample Density: 1.000 g/cm <sup>3</sup>           |
| Automatic Degas: No                      |                                                   |

**BJH Adsorption Cumulative Pore Volume (Larger)**

Halsey : Faas Correction

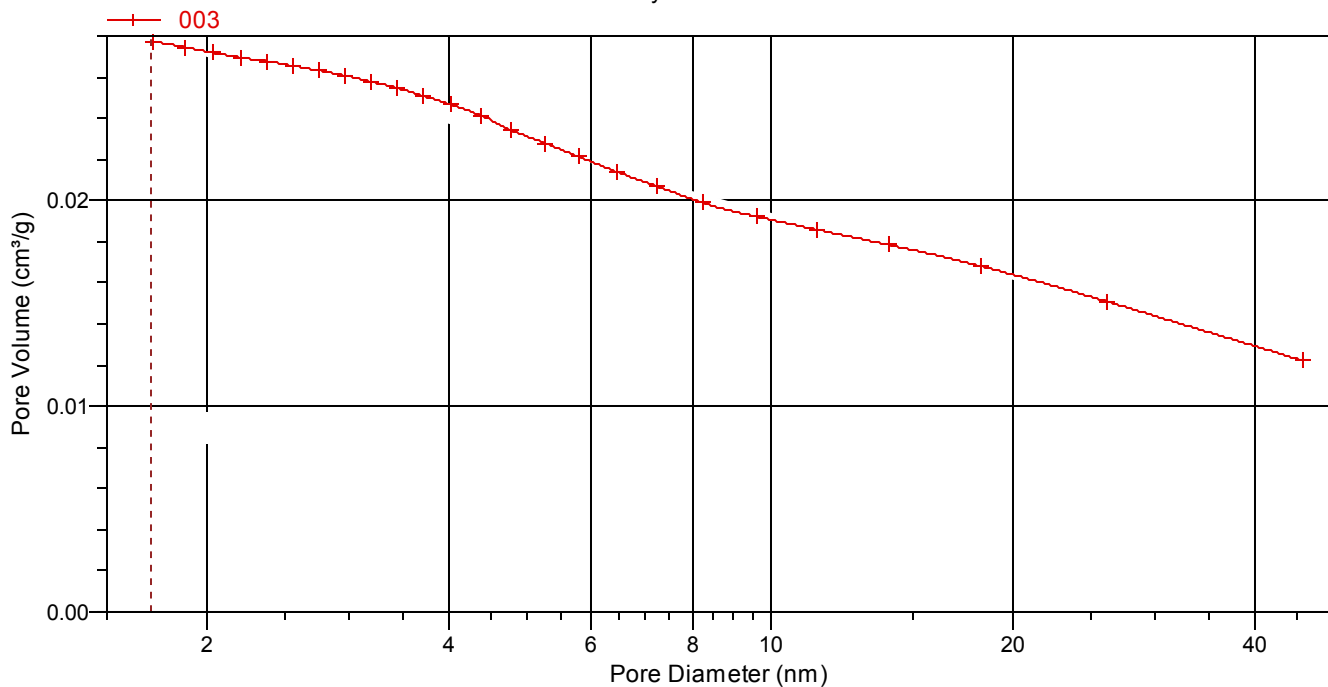

Sample: 003  
Operator:  
Submitter:  
File: D:\TriStar II 3020\data\FYH\WAILAI\3.SMP

|                                          |                                                   |
|------------------------------------------|---------------------------------------------------|
| Started: 9/26/2020 12:30:31 PM           | Analysis Adsorptive: N2                           |
| Completed: 1/1/1970 8:00:00 AM           | Analysis Bath Temp.: -195.850 °C                  |
| Report Time: 9/27/2020 11:50:51 AM       | Thermal Correction: No                            |
| Sample Mass: 0.1389 g                    | Warm Free Space: 14.9818 cm <sup>3</sup> Measured |
| Cold Free Space: 48.0193 cm <sup>3</sup> | Equilibration Interval: 10 s                      |
| Low Pressure Dose: None                  | Sample Density: 1.000 g/cm <sup>3</sup>           |
| Automatic Degas: No                      |                                                   |

**BJH Adsorption dV/dD Pore Volume**

Halsey : Faas Correction

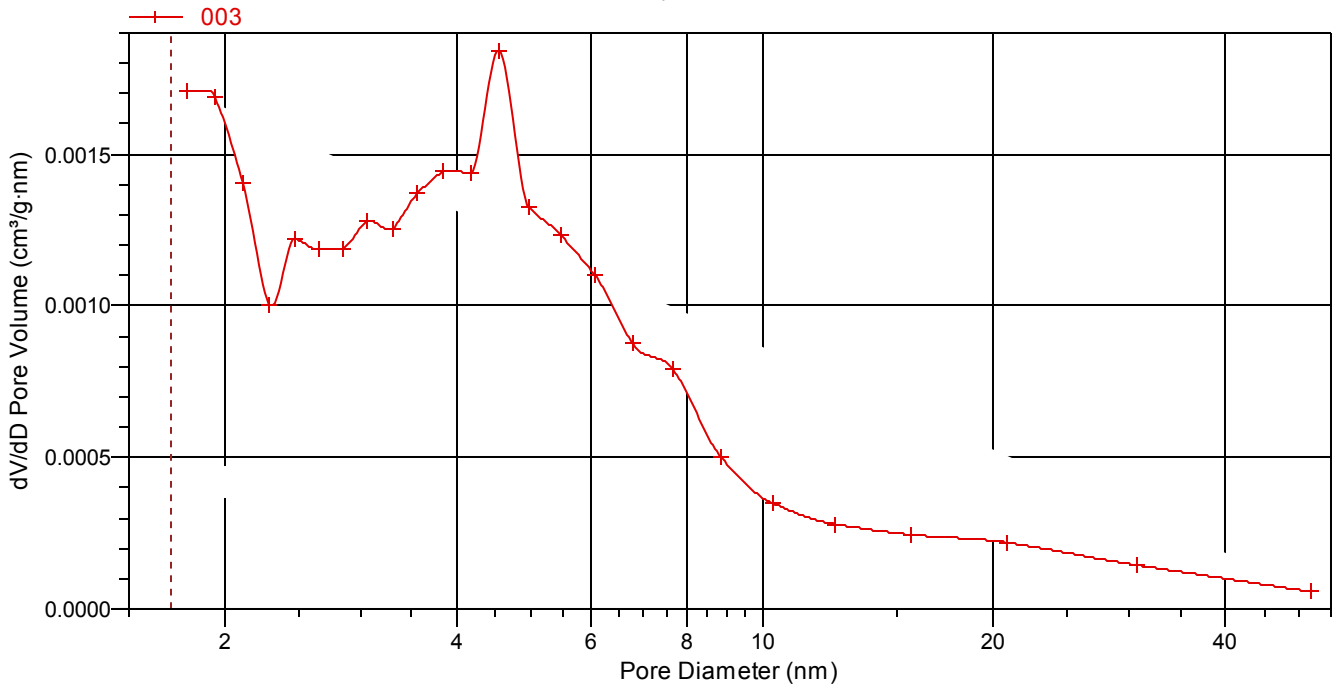

Sample: 003  
Operator:  
Submitter:  
File: D:\TriStar II 3020\data\FYH\WAILAI\3.SMP

|                                          |                                                   |
|------------------------------------------|---------------------------------------------------|
| Started: 9/26/2020 12:30:31 PM           | Analysis Adsorptive: N2                           |
| Completed: 1/1/1970 8:00:00 AM           | Analysis Bath Temp.: -195.850 °C                  |
| Report Time: 9/27/2020 11:50:51 AM       | Thermal Correction: No                            |
| Sample Mass: 0.1389 g                    | Warm Free Space: 14.9818 cm <sup>3</sup> Measured |
| Cold Free Space: 48.0193 cm <sup>3</sup> | Equilibration Interval: 10 s                      |
| Low Pressure Dose: None                  | Sample Density: 1.000 g/cm <sup>3</sup>           |
| Automatic Degas: No                      |                                                   |

**BJH Adsorption dV/dlog(D) Pore Volume**

Halsey : Faas Correction

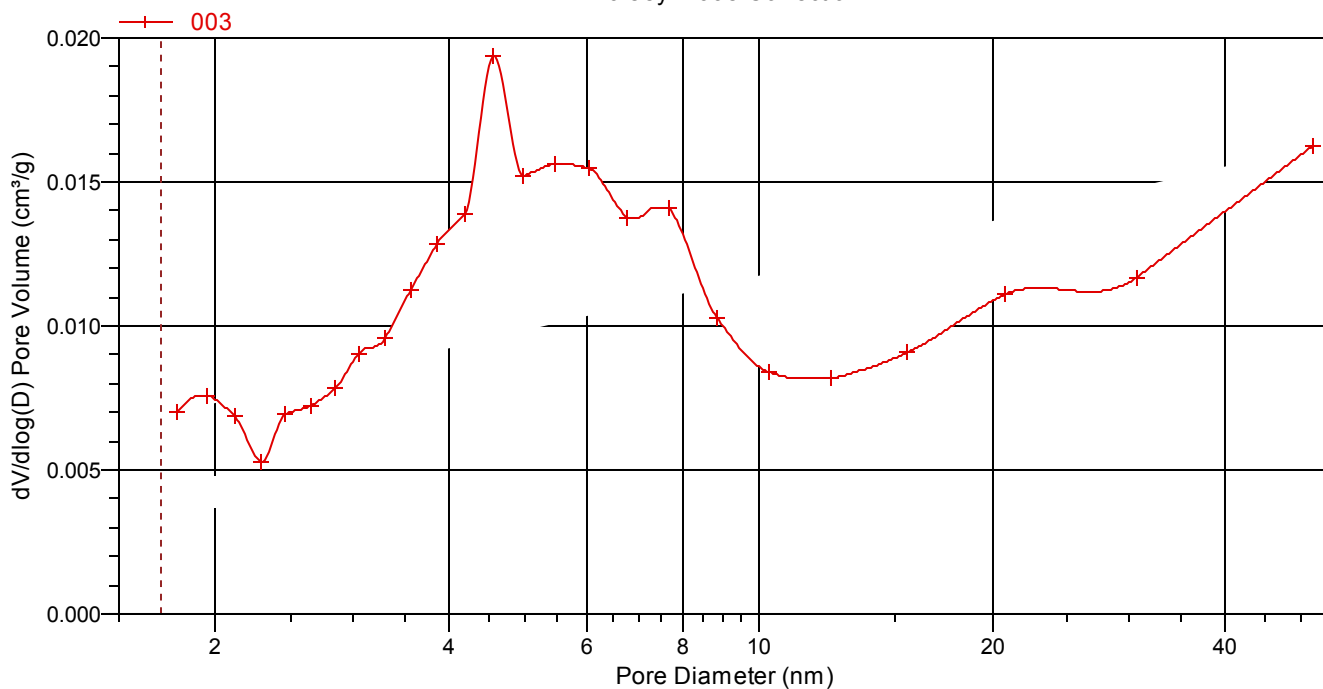

Sample: 003  
Operator:  
Submitter:  
File: D:\TriStar II 3020\data\FYH\WAILAI\3.SMP

|                                          |                                                   |
|------------------------------------------|---------------------------------------------------|
| Started: 9/26/2020 12:30:31 PM           | Analysis Adsorptive: N2                           |
| Completed: 1/1/1970 8:00:00 AM           | Analysis Bath Temp.: -195.850 °C                  |
| Report Time: 9/27/2020 11:50:51 AM       | Thermal Correction: No                            |
| Sample Mass: 0.1389 g                    | Warm Free Space: 14.9818 cm <sup>3</sup> Measured |
| Cold Free Space: 48.0193 cm <sup>3</sup> | Equilibration Interval: 10 s                      |
| Low Pressure Dose: None                  | Sample Density: 1.000 g/cm <sup>3</sup>           |
| Automatic Degas: No                      |                                                   |

**BJH Desorption Pore Distribution Report**

Faas Correction

Halsey

$$t = 3.54 [-5 / \ln(P/P_0)]^{0.333}$$

Diameter Range: 1.7000 nm to 300.0000 nm

Adsorbate Property Factor: 0.95300 nm

Density Conversion Factor: 0.0015468

Fraction of Pores Open at Both Ends: 0.00

| Pore Diameter Range (nm) | Average Diameter (nm) | Incremental Pore Volume (cm <sup>3</sup> /g) | Cumulative Pore Volume (cm <sup>3</sup> /g) | Incremental Pore Area (m <sup>2</sup> /g) | Cumulative Pore Area (m <sup>2</sup> /g) |
|--------------------------|-----------------------|----------------------------------------------|---------------------------------------------|-------------------------------------------|------------------------------------------|
| 259.3 - 47.3             | 53.6                  | 0.010105                                     | 0.010105                                    | 0.753                                     | 0.753                                    |
| 47.3 - 23.4              | 27.9                  | 0.004165                                     | 0.014270                                    | 0.597                                     | 1.350                                    |
| 23.4 - 16.1              | 18.4                  | 0.001753                                     | 0.016023                                    | 0.381                                     | 1.731                                    |
| 16.1 - 12.5              | 13.8                  | 0.000960                                     | 0.016983                                    | 0.278                                     | 2.009                                    |
| 12.5 - 10.2              | 11.1                  | 0.000713                                     | 0.017696                                    | 0.257                                     | 2.266                                    |
| 10.2 - 9.3               | 9.7                   | 0.000210                                     | 0.017906                                    | 0.086                                     | 2.352                                    |
| 9.3 - 8.0                | 8.6                   | 0.000447                                     | 0.018353                                    | 0.209                                     | 2.561                                    |
| 8.0 - 6.9                | 7.4                   | 0.000367                                     | 0.018720                                    | 0.199                                     | 2.760                                    |
| 6.9 - 6.1                | 6.5                   | 0.000325                                     | 0.019045                                    | 0.201                                     | 2.961                                    |
| 6.1 - 5.4                | 5.7                   | 0.000252                                     | 0.019297                                    | 0.176                                     | 3.137                                    |
| 5.4 - 4.9                | 5.1                   | 0.000171                                     | 0.019468                                    | 0.133                                     | 3.270                                    |
| 4.9 - 4.4                | 4.6                   | 0.000202                                     | 0.019670                                    | 0.175                                     | 3.445                                    |

Sample: 003  
Operator:  
Submitter:  
File: D:\TriStar II 3020\data\FYH\WAILAI\3.SMP

|                                          |                                                   |
|------------------------------------------|---------------------------------------------------|
| Started: 9/26/2020 12:30:31 PM           | Analysis Adsorptive: N2                           |
| Completed: 1/1/1970 8:00:00 AM           | Analysis Bath Temp.: -195.850 °C                  |
| Report Time: 9/27/2020 11:50:51 AM       | Thermal Correction: No                            |
| Sample Mass: 0.1389 g                    | Warm Free Space: 14.9818 cm <sup>3</sup> Measured |
| Cold Free Space: 48.0193 cm <sup>3</sup> | Equilibration Interval: 10 s                      |
| Low Pressure Dose: None                  | Sample Density: 1.000 g/cm <sup>3</sup>           |
| Automatic Degas: No                      |                                                   |

| Pore Diameter Range (nm) | Average Diameter (nm) | Incremental Pore Volume (cm <sup>3</sup> /g) | Cumulative Pore Volume (cm <sup>3</sup> /g) | Incremental Pore Area (m <sup>2</sup> /g) | Cumulative Pore Area (m <sup>2</sup> /g) |
|--------------------------|-----------------------|----------------------------------------------|---------------------------------------------|-------------------------------------------|------------------------------------------|
| 4.4 - 4.0                | 4.2                   | 0.000178                                     | 0.019849                                    | 0.170                                     | 3.615                                    |
| 4.0 - 3.7                | 3.8                   | 0.000181                                     | 0.020029                                    | 0.190                                     | 3.805                                    |
| 3.7 - 3.4                | 3.5                   | 0.001732                                     | 0.021761                                    | 1.986                                     | 5.791                                    |
| 3.4 - 3.1                | 3.2                   | 0.003503                                     | 0.025264                                    | 4.382                                     | 10.173                                   |
| 3.1 - 2.8                | 2.9                   | 0.000755                                     | 0.026019                                    | 1.031                                     | 11.204                                   |
| 2.8 - 2.5                | 2.6                   | 0.000466                                     | 0.026486                                    | 0.713                                     | 11.917                                   |
| 2.5 - 2.3                | 2.4                   | 0.000275                                     | 0.026761                                    | 0.468                                     | 12.385                                   |
| 2.3 - 2.1                | 2.2                   | 0.000260                                     | 0.027022                                    | 0.483                                     | 12.867                                   |
| 2.1 - 1.9                | 2.0                   | 0.000256                                     | 0.027278                                    | 0.519                                     | 13.386                                   |
| 1.9 - 1.7                | 1.8                   | 0.000251                                     | 0.027529                                    | 0.558                                     | 13.945                                   |

Sample: 003  
Operator:  
Submitter:  
File: D:\TriStar II 3020\data\FYH\WAILAI\3.SMP

|                                          |                                                   |
|------------------------------------------|---------------------------------------------------|
| Started: 9/26/2020 12:30:31 PM           | Analysis Adsorptive: N2                           |
| Completed: 1/1/1970 8:00:00 AM           | Analysis Bath Temp.: -195.850 °C                  |
| Report Time: 9/27/2020 11:50:51 AM       | Thermal Correction: No                            |
| Sample Mass: 0.1389 g                    | Warm Free Space: 14.9818 cm <sup>3</sup> Measured |
| Cold Free Space: 48.0193 cm <sup>3</sup> | Equilibration Interval: 10 s                      |
| Low Pressure Dose: None                  | Sample Density: 1.000 g/cm <sup>3</sup>           |
| Automatic Degas: No                      |                                                   |

**BJH Desorption Cumulative Pore Volume (Larger)**

Halsey : Faas Correction

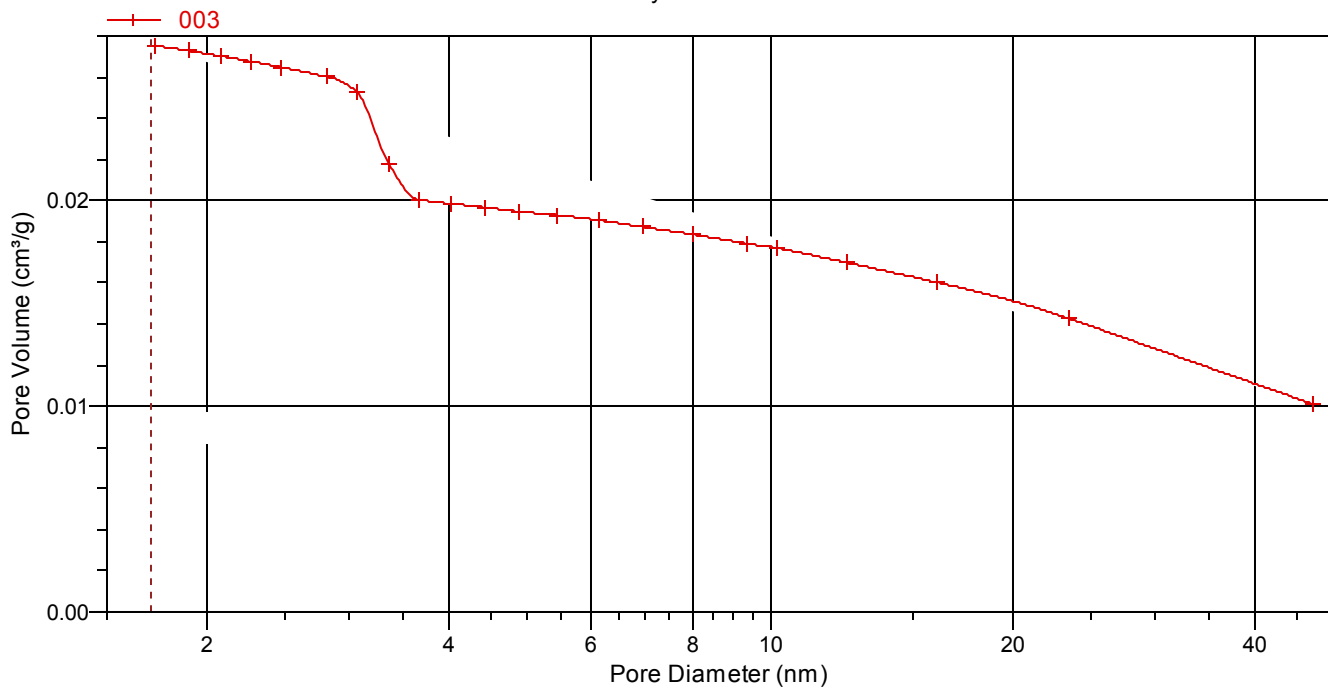



Sample: 003  
Operator:  
Submitter:  
File: D:\TriStar II 3020\data\FYH\WAILAI\3.SMP

|                                          |                                                   |
|------------------------------------------|---------------------------------------------------|
| Started: 9/26/2020 12:30:31 PM           | Analysis Adsorptive: N2                           |
| Completed: 1/1/1970 8:00:00 AM           | Analysis Bath Temp.: -195.850 °C                  |
| Report Time: 9/27/2020 11:50:51 AM       | Thermal Correction: No                            |
| Sample Mass: 0.1389 g                    | Warm Free Space: 14.9818 cm <sup>3</sup> Measured |
| Cold Free Space: 48.0193 cm <sup>3</sup> | Equilibration Interval: 10 s                      |
| Low Pressure Dose: None                  | Sample Density: 1.000 g/cm <sup>3</sup>           |
| Automatic Degas: No                      |                                                   |

**BJH Desorption dV/dD Pore Volume**

Halsey : Faas Correction

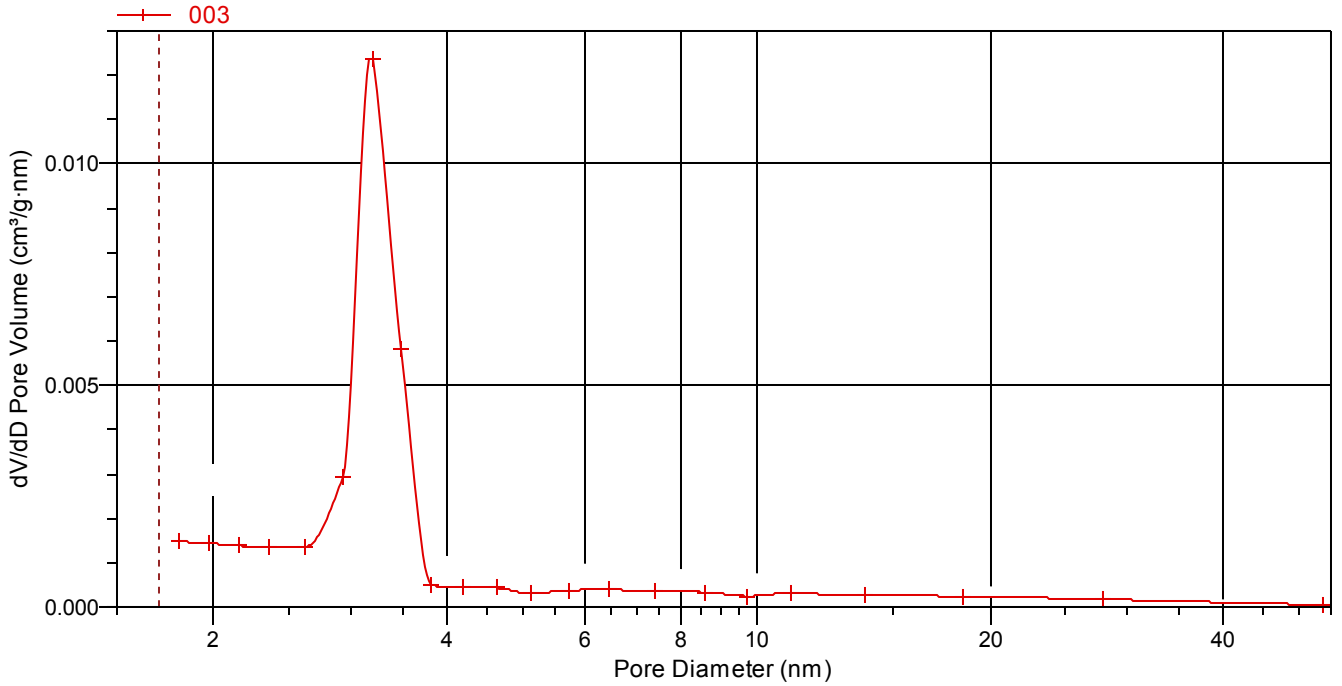

Sample: 003  
Operator:  
Submitter:  
File: D:\TriStar II 3020\data\FYH\WAILAI\3.SMP

|                                          |                                                   |
|------------------------------------------|---------------------------------------------------|
| Started: 9/26/2020 12:30:31 PM           | Analysis Adsorptive: N2                           |
| Completed: 1/1/1970 8:00:00 AM           | Analysis Bath Temp.: -195.850 °C                  |
| Report Time: 9/27/2020 11:50:51 AM       | Thermal Correction: No                            |
| Sample Mass: 0.1389 g                    | Warm Free Space: 14.9818 cm <sup>3</sup> Measured |
| Cold Free Space: 48.0193 cm <sup>3</sup> | Equilibration Interval: 10 s                      |
| Low Pressure Dose: None                  | Sample Density: 1.000 g/cm <sup>3</sup>           |
| Automatic Degas: No                      |                                                   |

**BJH Desorption dV/dlog(D) Pore Volume**

Halsey : Faas Correction

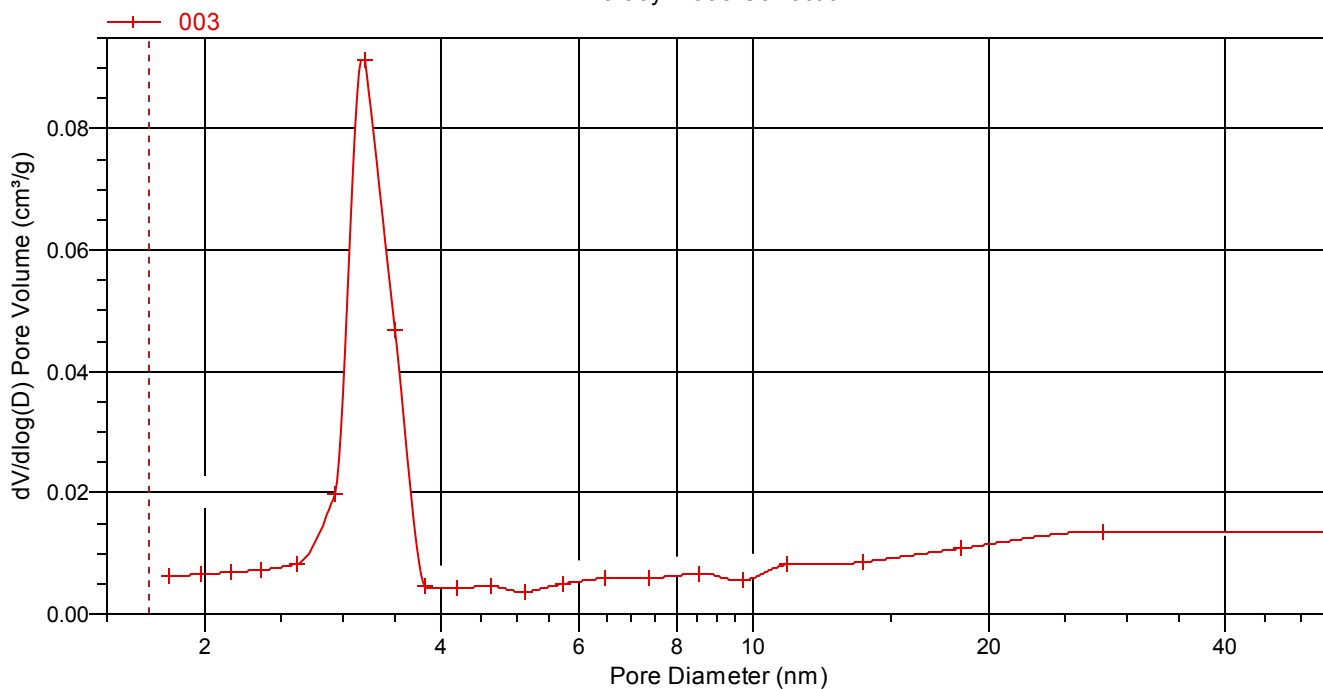

Supplement: d0ra06746f1.pdf [file d0ra06746f1.pdf]
